# Supplementary material for: Preparation of lignin-based vinylogous urethane vitrimer materials and their potential use as on-demand removable adhesives
Source: Royal Society of Chemistry journal article supplement (doi:10.1039/d3gc02799f), 2023-10-19
Supplement: d3gc02799f1.pdf [file d3gc02799f1.pdf]

## Supporting information

# Preparation of lignin-based vinylogous urethane vitrimer materials and their potential use for on-demand removable adhesives

Jian Liu <sup>a</sup>, Andrij Pich <sup>a,b,c</sup>, Katrien V. Bernaerts <sup>a\*</sup>

<sup>a</sup> Maastricht University, Faculty of Science and Engineering, Aachen-Maastricht Institute for Biobased Materials (AMIBM), Sustainable Polymer Synthesis Group, Brightlands Chemelot Campus, Urmonderbaan 22, 6167 RD Geleen, the Netherlands

<sup>b</sup> DWI-Leibniz-Institute for Interactive Materials, Forckenbeckstraße 50, 52074 Aachen, Germany

<sup>c</sup> Functional and Interactive Polymers, Institute of Technical and Macromolecular Chemistry, RWTH Aachen University, Worringerweg 2, 52074 Aachen, Germany

\*E-mail: [katrien.bernaerts@maastrichtuniversity.nl](mailto:katrien.bernaerts@maastrichtuniversity.nl)

### S† Figures and tables

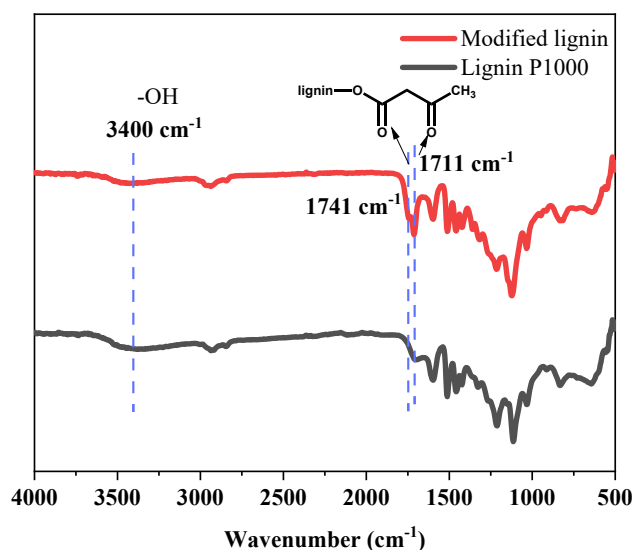

Fig. S1† FTIR spectra of modified lignin and unmodified lignin.

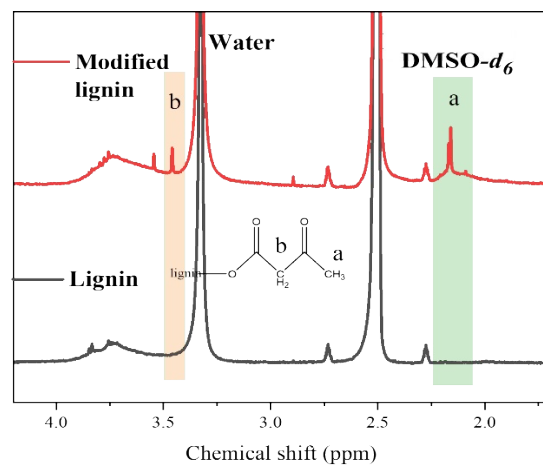

Fig. S2† <sup>1</sup>H-NMR spectra of modified lignin and unmodified lignin (DMSO-*d*<sub>6</sub>).

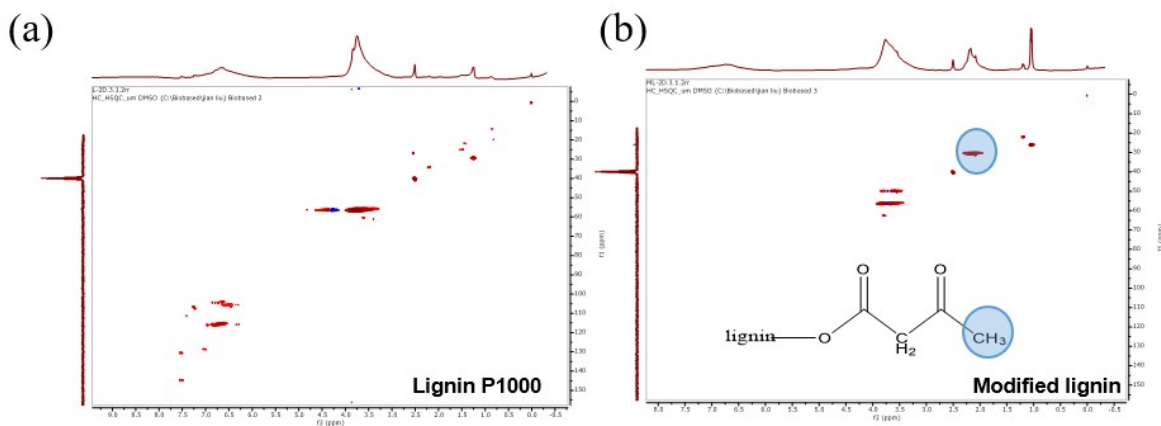

Fig. S3† (a) 2D-HSQC NMR spectra of unmodified lignin (DMSO-*d*<sub>6</sub>); (b) 2D-HSQC NMR spectra of modified lignin (DMSO-*d*<sub>6</sub>).

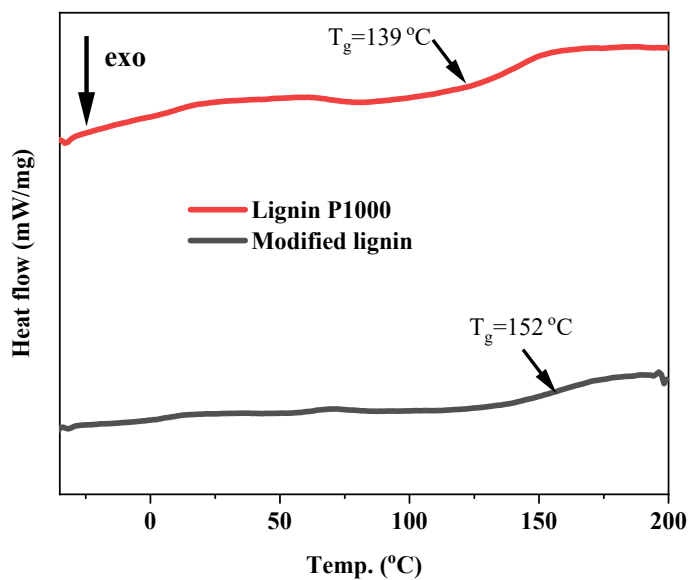

Fig. S4† DSC (second heating curve) of modified lignin and unmodified lignin.

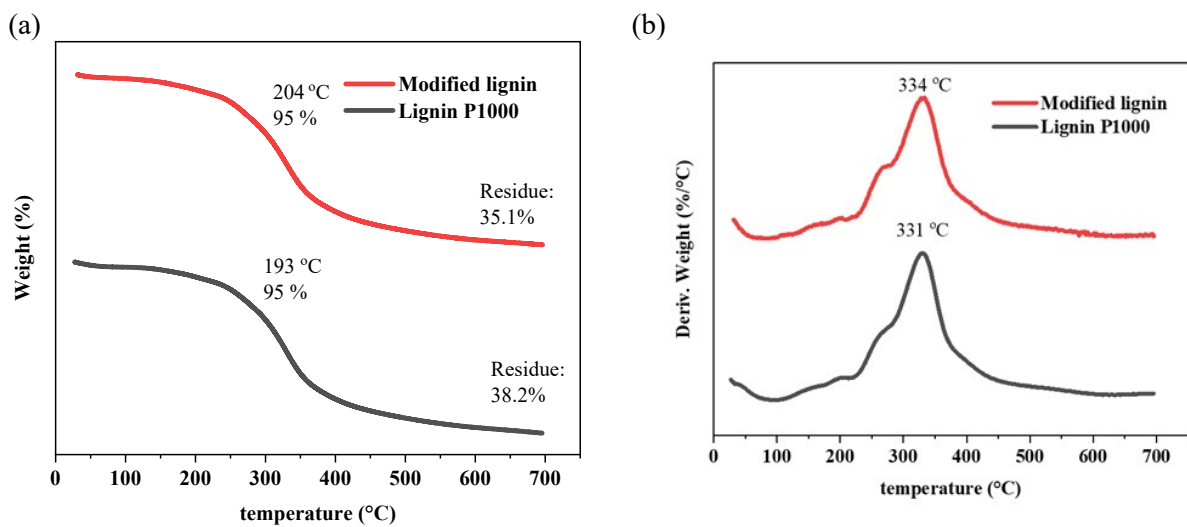

Fig. S5† (a) TGA of modified lignin and unmodified lignin (10 °C/min, nitrogen atmosphere). (b) DTGA of modified lignin and unmodified lignin (10 °C/min, nitrogen atmosphere).

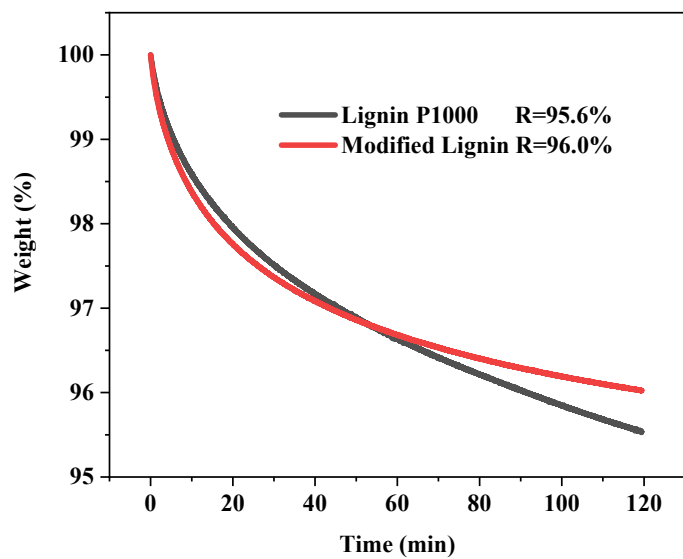

Fig. S6† Isothermal TGA curves of modified lignin and unmodified lignin at 170 °C (post-curing conditions). R = residue.

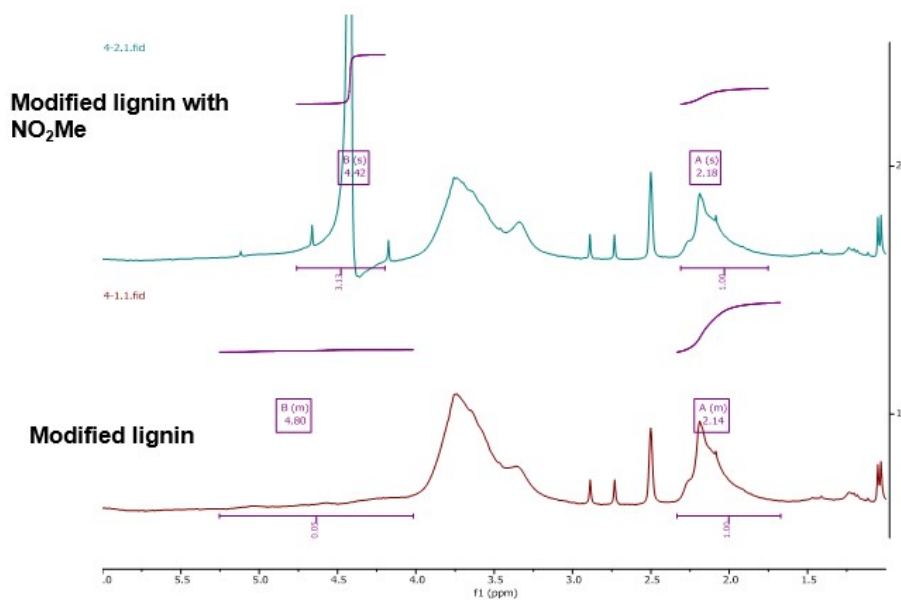

Fig. S7† Quantitative  $^1\text{H}$  NMR was used to calculate the degree of modification ( $\text{DMSO-}d_6$ ).

$Molality_{OAcAc}$

$$= m_{OAcAc} = \frac{OAcAc_{mole}}{modified\ lignin_{kg}} = \left( \frac{mass_{NO_2Me(g)}}{molar\ mass_{NO_2Me(g)}} \right) \times \left( \frac{OAcAc_{in}}{NO_2Me_{in}} \right)$$

$$\left( \frac{sample\ mass_g}{1000 \frac{g}{kg}} \right) = \frac{0.0152\ g}{61.04\ g/mol} \times \frac{1}{(3.13 - 0.05)} \div 0.0332\ g \times 1000\ g/kg = 2.43\ mol$$

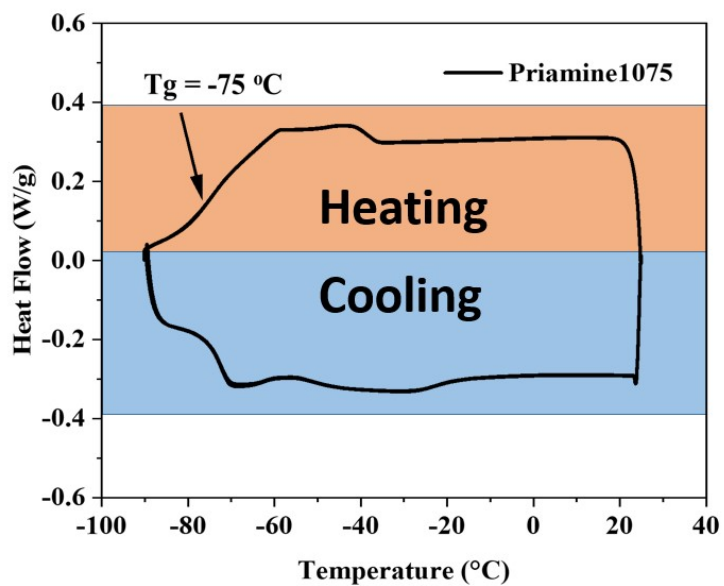

Fig. S8† DSC (second heating and cooling) of Priamine™ 1075.

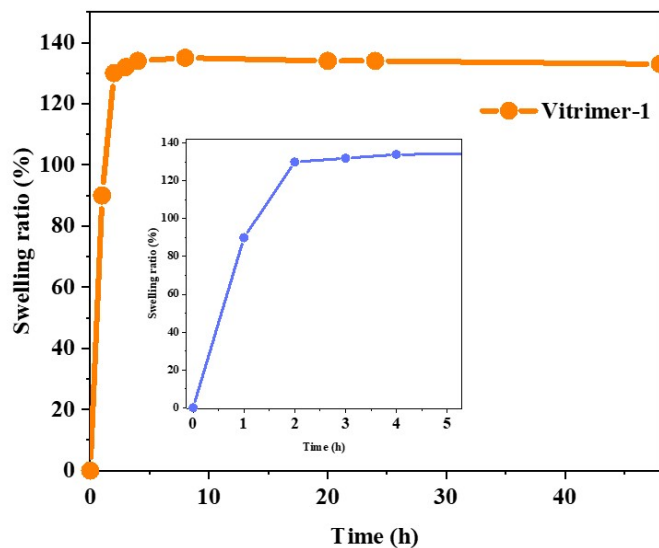

Fig. S9† Swelling ratio of Vitrimer-1 in 2-MeTHF solvent at room temperature with time.

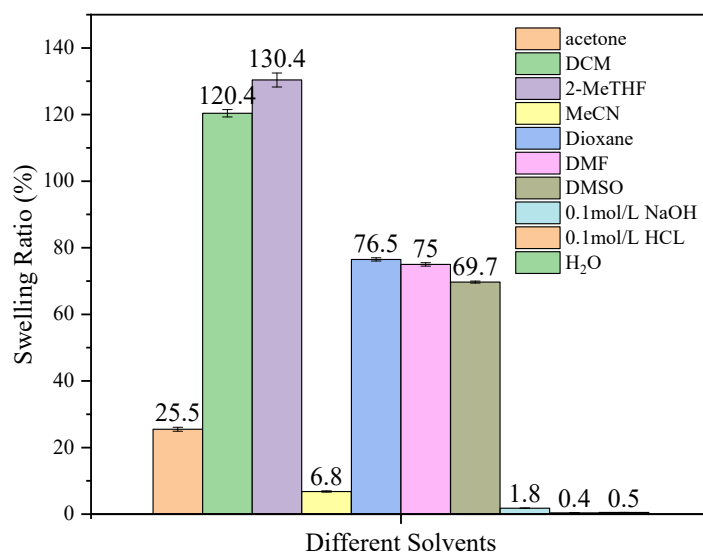

Fig. S10† Swelling ratio of Vitrimer-1 in different solvents at room temperature.

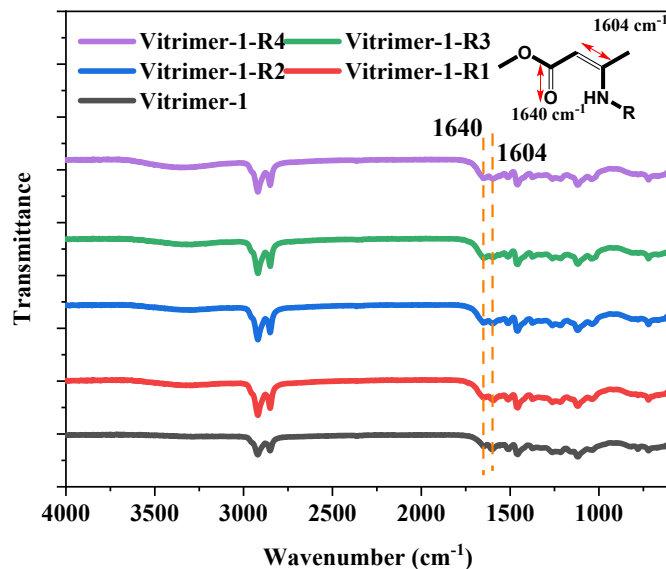

Fig. S11† FTIR spectra of recycled samples.

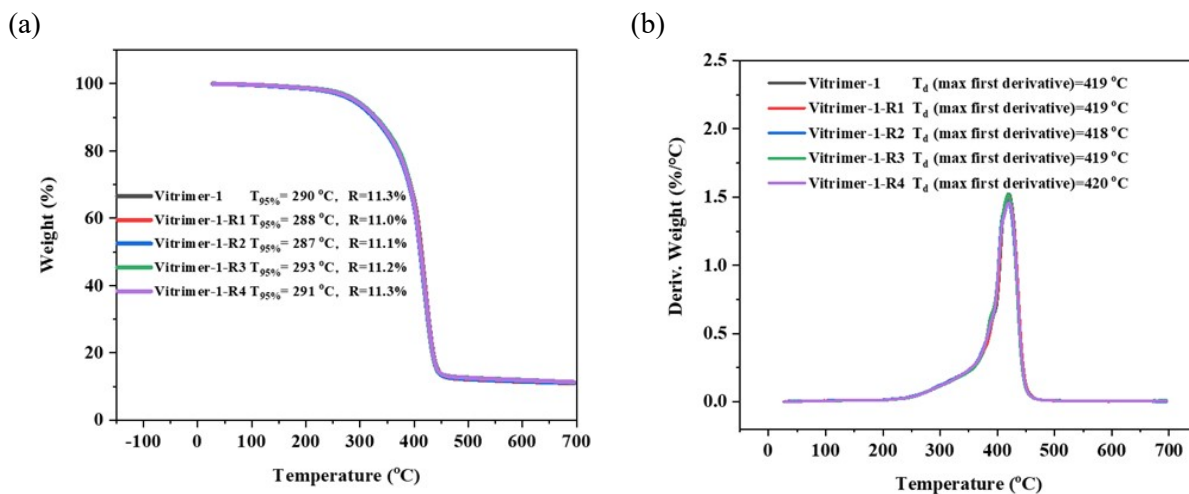

Fig. S12† (a) TGA curves of recycled samples (10 °C/min, nitrogen atmosphere). (b) DTGA curves of recycled samples (10 °C/min, nitrogen atmosphere).

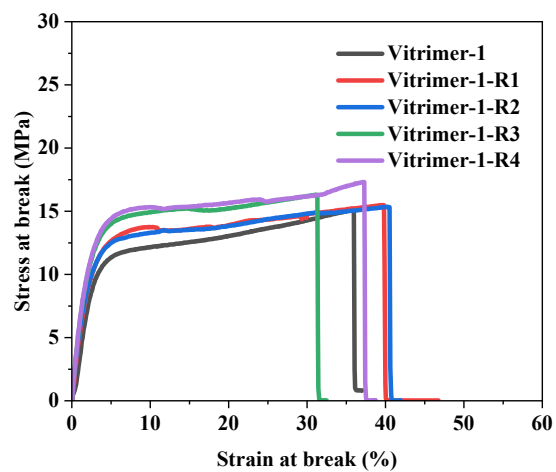

Fig. S13† Tensile properties of recycled samples

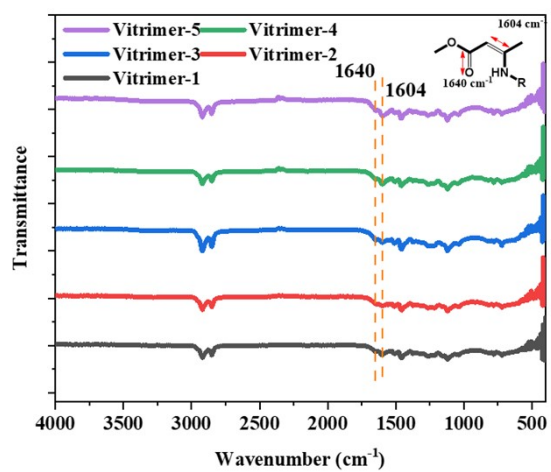

Fig. S14† FTIR spectra of different ratios' vitrimer samples.

(a)

(b)



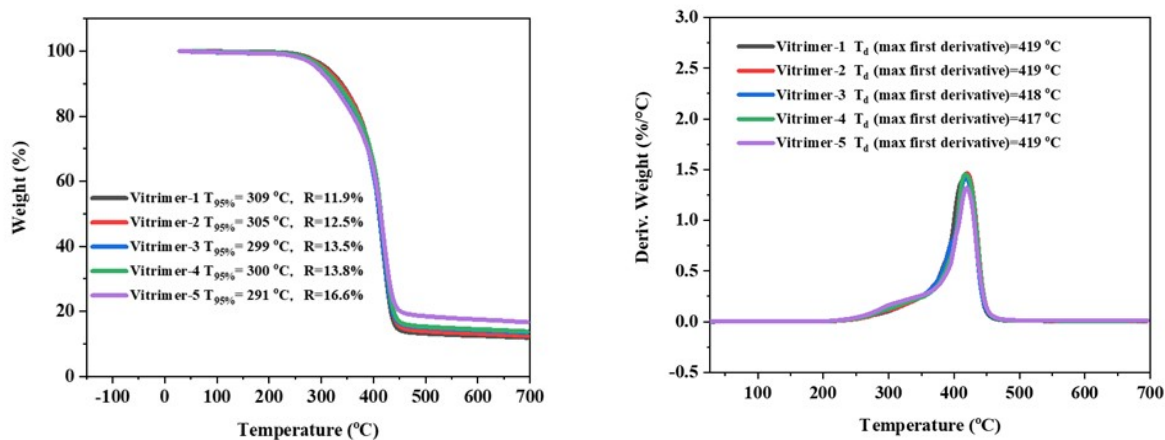

Fig. S15† (a) TGA curves of different ratios' vitrimer samples (10 °C/min, nitrogen atmosphere). (b) DTGA curves of different ratios' vitrimer samples (10 °C/min, nitrogen atmosphere).

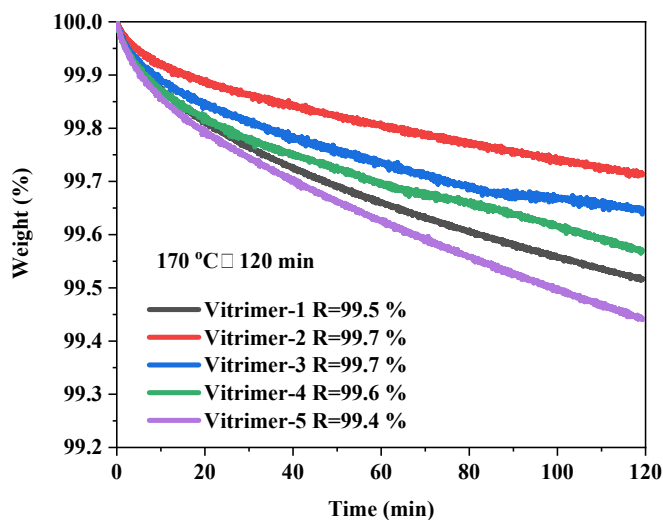

Fig. S16† Isothermal TGA curves at 170 °C of vitrimer samples with different ratio's Priamine™ 1075 and 1, 10 diaminodecane.

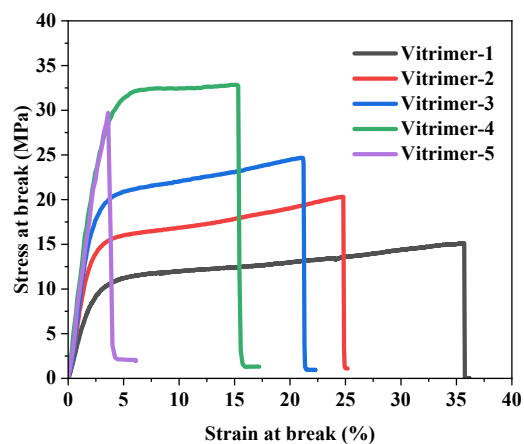

Fig. S17† Tensile properties of vitrimers with different ratio's Priamine™ 1075 and 1, 10 diaminodecane.

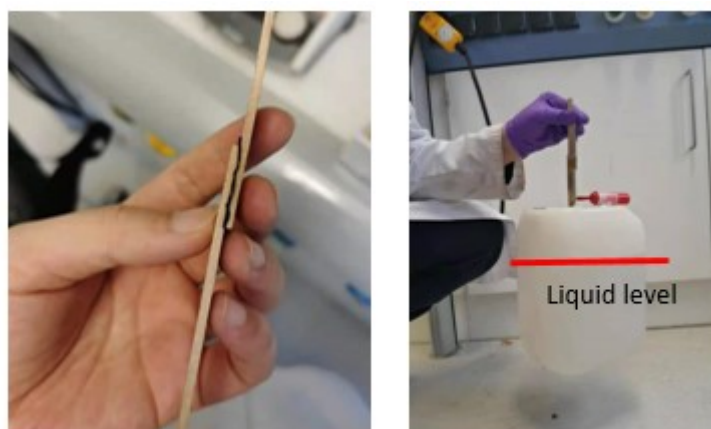

Fig. S18† Photos of shear test samples

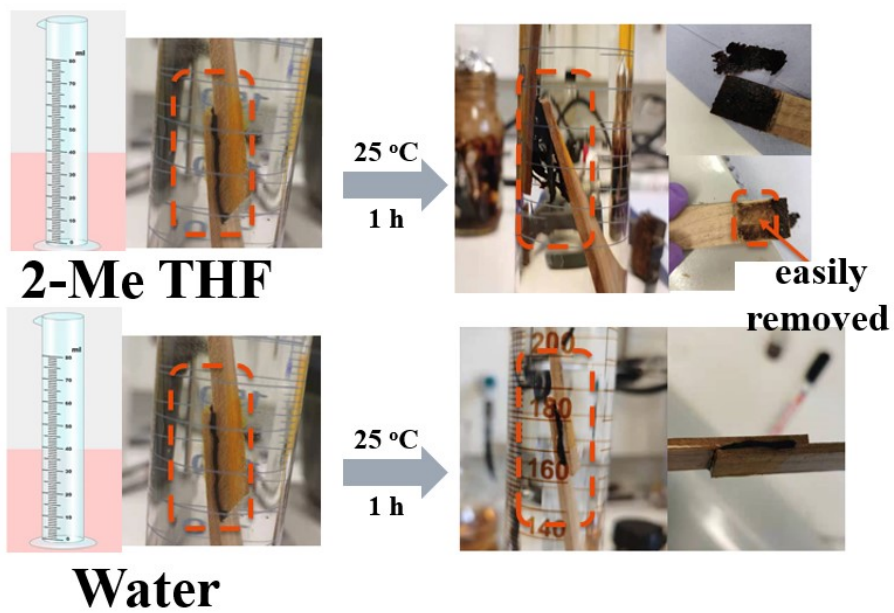

Fig. S19† Solvent removal of adhesives at room temperature.

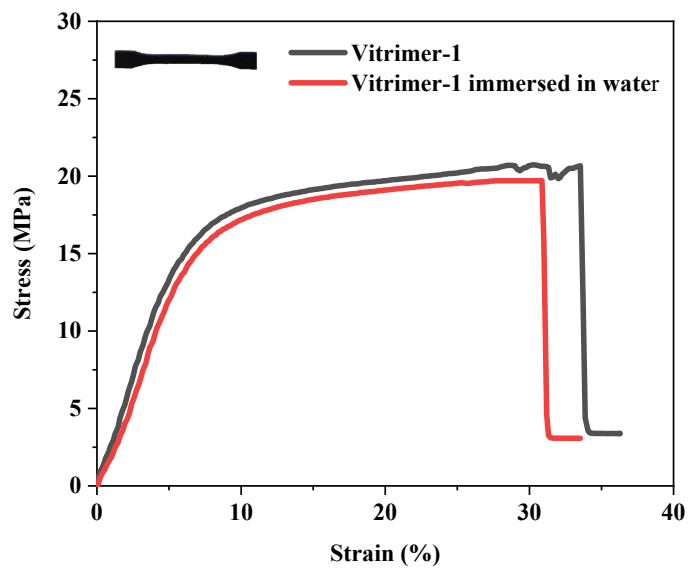

Fig. S20† Tensile test curves of materials in different solvents.

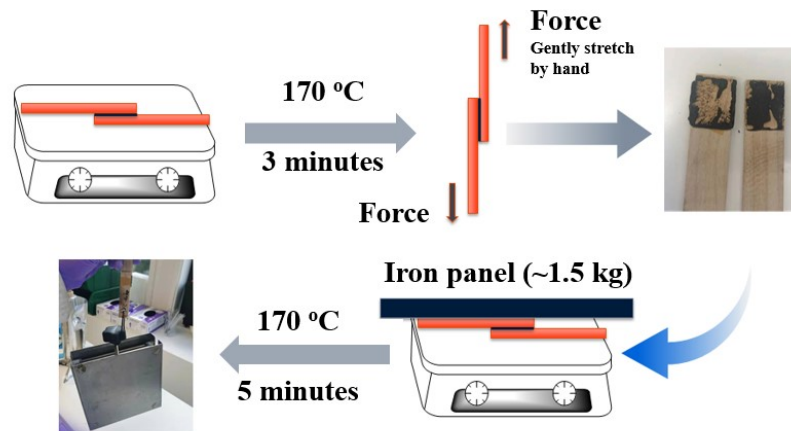

Fig. S21† Heat removal of adhesives at 170 °C.

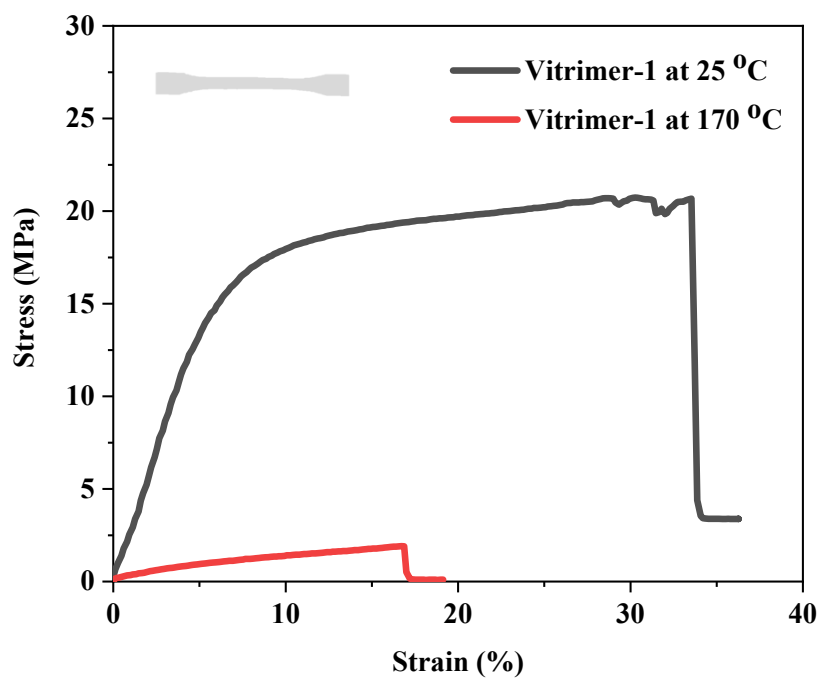

Fig. S22† Tensile test curves of materials at different temperatures.

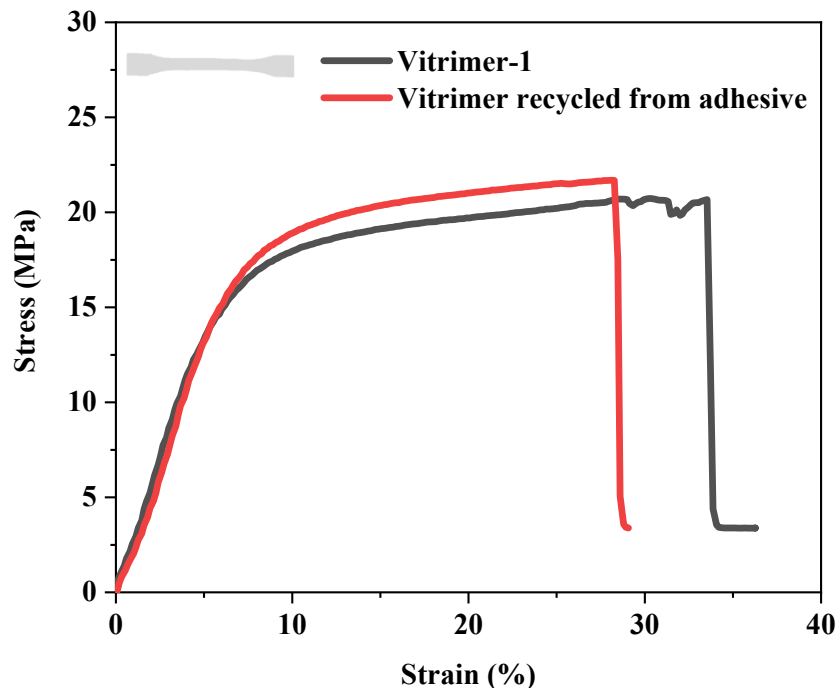

Fig. S23† Comparison of tensile test curves of free standing film materials before and after recycling.

### Calculations for stress relaxation derived activation energy

Equation obtained from Arrhenius law:  $y = 16.058x - 33.261$  ( $R^2 = 0.9981$ )

Which corresponds to  $\ln(\tau^*) = 16.058 * 1000/T - 33.261$

The Arrhenius law related to the activation energy is  $\tau^* = \tau_0 \exp(E_a/RT)$  ( $R = 8.314$ )

Therefore:  $\ln(\tau^*) = \ln(\tau_0) + E_a/RT$

Identifying this to the experimental equation:  $E_a/R = 16.058 * 1000$

$E_a = 16.058 * 1000 * 8.314 = 130.5$  kJ/mol

Table S1. Comparison of this work with conventional adhesives.

| Case                  | Vitrimer adhesive<br><b>This work</b> | Thermosetting adhesive<br>e.g. phenol formaldehyde | Thermoplastic adhesive<br>e.g. poly(ethylene-vinyl acetate) (PEVA) |
|-----------------------|---------------------------------------|----------------------------------------------------|--------------------------------------------------------------------|
| Adhesive state        | <b>Solid</b>                          | Liquid                                             | Solid                                                              |
| Bonding method        | <b>Heating</b>                        | Heating                                            | Heating                                                            |
| Melting properties    | <b>No</b>                             | No                                                 | <b>Yes</b>                                                         |
| Solubility in solvent | <b>No</b>                             | No                                                 | <b>Yes</b>                                                         |
| Rebonding properties  | <b>Yes</b>                            | <b>No</b>                                          | <b>Yes</b>                                                         |
| Removal properties    | <b>Yes</b>                            | <b>No</b>                                          | <b>Yes</b>                                                         |

## References

1. M. A. Jedrzejczyk, S. Van den Bosch, J. Van Aelst, K. Van Aelst, P. D. Kouris, M. Moalin, G. Haenen, M. D. Boot, E. J. M. Hensen, B. Lagrain, B. F. Sels and K. V. Bernaerts, *Acs Sustainable Chemistry & Engineering*, 2021, **9**, 12548-12559. <https://doi.org/10.1021/acssuschemeng.1c02799>
2. R. J. A. Gosselink, A. Abacherli, H. Semke, R. Malherbe, P. Kauper, A. Nadif and J. E. G. van Dam, *Industrial Crops and Products*, 2004, **19**, 271-281. <https://doi.org/10.1016/j.indcrop.2003.10.008>
3. M. A. Jedrzejczyk, P. D. Kouris, M. D. Boot, E. J. M. Hensen and K. V. Bernaerts, *ACS Applied Polymer Materials*, 2022, **4**, 2544-2552. <https://doi.org/10.1021/acsapm.1c01853>
4. F. I. Altuna, V. Pettarin and R. J. J. Williams, *Green Chemistry*, 2013, **15**, 3360-3366. <https://doi.org/10.1039/c3gc41384e>
5. Z. B. Feng, B. Yu, J. Hu, H. L. Zuo, J. P. Li, H. B. Sun, N. Y. Ning, M. Tian and L. Q. Zhang, *Industrial & Engineering Chemistry Research*, 2019, **58**, 1212-1221. <https://doi.org/10.1021/acs.iecr.8b05309>
6. Q. Shi, K. Yu, M. L. Dunn, T. J. Wang and H. J. Qi, *Macromolecules*, 2016, **49**, 5527-5537. <https://doi.org/10.1021/acs.macromol.6b00858>
7. S. Dhers, G. Vantomme and L. Averous, *Green Chemistry*, 2019, **21**, 1596-1601. <https://doi.org/10.1039/c9gc00540d>
8. S. Zhang, T. Liu, C. Hao, L. W. Wang, J. R. Han, H. Liu and J. W. Zhang, *Green Chemistry*, 2018, **20**, 2995-3000. <https://doi.org/10.1039/c8gc01299g>
9. Z. Q. Pei, Y. Yang, Q. M. Chen, E. M. Terentjev, Y. Wei and Y. Ji, *Nature Materials*, 2014, **13**, 36-41. <https://doi.org/10.1038/nmat3812>
10. X. X. Yang, L. Z. Guo, X. Xu, S. B. Shang and H. Liu, *Materials & Design*, 2020, **186**. <https://doi.org/10.1016/j.matdes.2019.108248>
